## Correction: CFC1 is a cancer stemness-regulating factor in neuroblastoma

Koji Chikaraishi<sup>1,2</sup>, Hisanori Takenobu<sup>1,3</sup>, Ryuichi P. Sugino<sup>1</sup>, Kyosuke Mukae<sup>1,3</sup>, Jesmin Akter<sup>1</sup>, Masayuki Haruta<sup>1,3</sup>, Masafumi Kurosumi<sup>4</sup>, Takaho A. Endo<sup>5</sup>, Haruhiko Koseki<sup>6</sup>, Naoki Shimojo<sup>2</sup>, Miki Ohira<sup>1,3</sup> and Takehiko Kamijo<sup>1,3</sup>

<sup>1</sup>Research Institute for Clinical Oncology, Saitama Cancer Center, Saitama, Japan

<sup>2</sup>Department of Pediatrics, Chiba University, Chiba, Japan

<sup>3</sup>Laboratory of Tumor Molecular Biology, Department of Graduate School of Science and Engineering, Saitama University, Saitama, Japan

<sup>4</sup>Department of Pathology, Saitama Cancer Center, Saitama, Japan

<sup>5</sup>Laboratory for Integrative Genomics, RIKEN Center for Integrative Medical Sciences, Kanagawa, Japan

<sup>6</sup>Laboratory for Developmental Genetics, RIKEN Center for Integrative Medical Sciences, Kanagawa, Japan

### Published:

**Copyright:** Chikaraishi et al. This is an open-access article distributed under the terms of the Creative Commons Attribution License 3.0 (CC BY 3.0), which permits unrestricted use, distribution, and reproduction in any medium, provided the original author and source are credited.

**This article has been corrected:** Due to errors in table assembly, the supplementary table 3 (primer sequences) are not correct. The proper Supplementary Table 3 is shown below. The authors declare that these corrections do not change the results or conclusions of this paper.

Original article: Oncotarget. 2017; 8:45046–45059. <https://doi.org/10.18632/oncotarget.18464>

**Supplementary Table 3: Primer information**

| Gene                              | Forward                     | Reverse                    | Accession number |
|-----------------------------------|-----------------------------|----------------------------|------------------|
| <i>ACTB</i>                       | CAAGAGATGGCCACGGCTGCT       | TCCTTCTGCATCCTGTCGGCA      | NM_001101.3      |
| <i>ACTB</i><br>( <i>qPCR</i> )    | CCTGGCACCCAGCACAAT          | CCGATCCACACGGAGTACTTG      | NM_001101.3      |
| <i>CD133</i>                      | AACTGGCTAAGTACTATCGTCGAATGG | TCCTTTCCACTTTGAGTATCCTGATG | NM_006017        |
| <i>CFC1</i>                       | TCAGAAGCACCGACAGTCAC        | TCTGGTCATGCTCGCAGTAG       | NM_032545.3      |
| <i>CFC1</i><br>( <i>cloning</i> ) | AAAATGACCTGGAGGCACCAT       | TAAAGGCGATGCCCAAGTCC       | NM_032545.3      |
| <i>CFC1</i><br>( <i>qPCR</i> )    | TCAGTTTGGCATTACAGATCATCA    | TACCGCCGTTATGTTTCTCTCTT    | NM_032545.3      |
| <i>EBNA1</i>                      | GCCGGTGTGTTTCGTATATGG       | CAAAACCTCAGCAAATATATGAG    | NC_007605.1      |
| <i>GAP43</i>                      | GGAGAAGGCACCACTACTGTC       | GGCGAGTTATCAGTGGAAGC       | NM_001130064     |
| <i>GAPDH</i>                      | ACCACAGTCCATGCCATCAC        | TCCACCACCCTGTTGCTGTA       | NM_002046        |
| <i>KISS1R</i>                     | CTCGCTGGTCATCTACGTCA        | ACCGAGACCTGCTGGATGTA       | NM_032551.4      |
| <i>LRRN2</i>                      | CCCGAGACTGTGATTTCCAT        | AAGTTGCTGAGGCCAGAAAA       | NM_006338.2      |
| <i>NF68</i>                       | ACCAAGACCTCCTCAACGTG        | CTTCGATCTGCTCCTCTTGG       | NM_006158        |

Primer information for RT-PCR, qPCR, genomic DNA, and sub-cloning used in this study.
